# Supplementary material
Source: Springer Nature journal article supplement (https://www.springermedizin.de/resource/supplementary/12955_2006_265_MOESM1_ESM.pdf/9560018)

### Physical Component

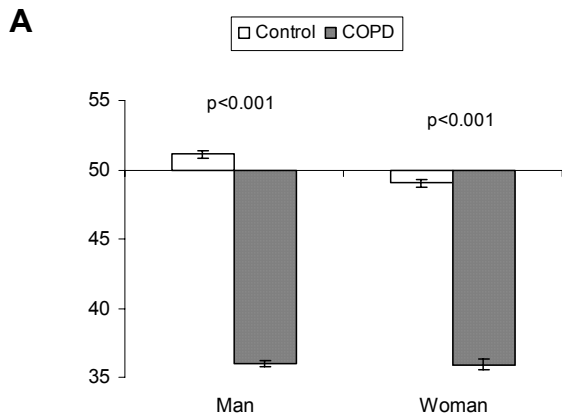

### Mental Component

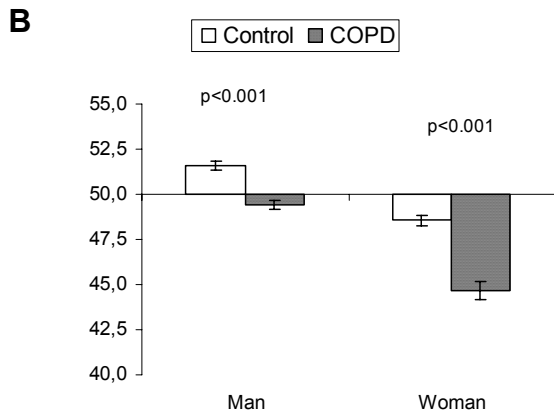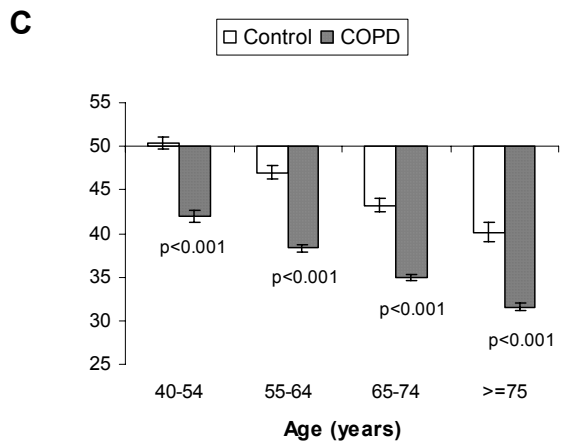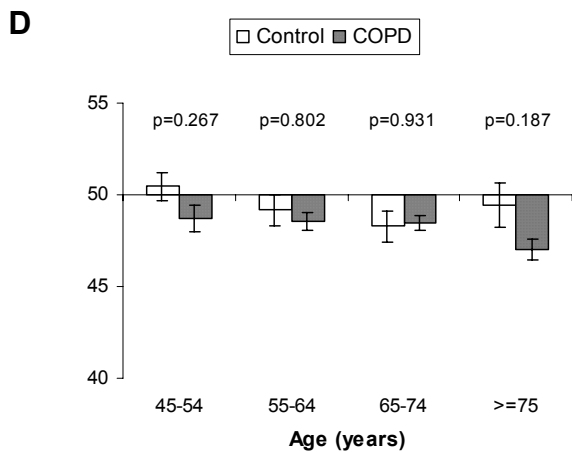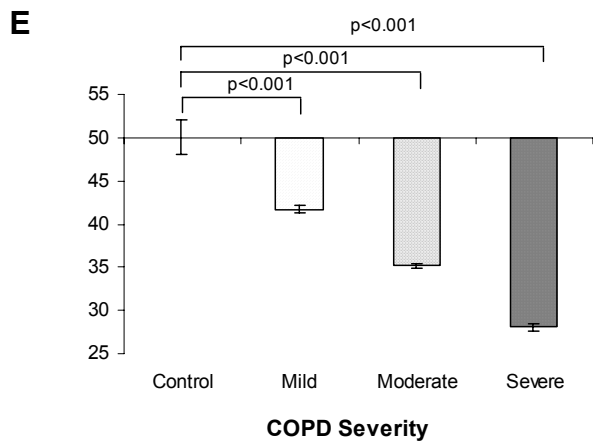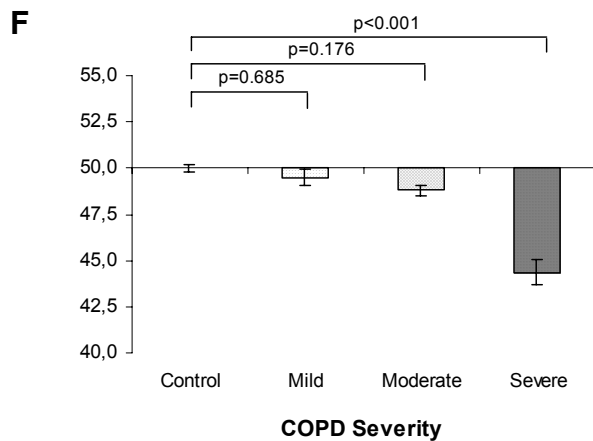

Supplement: MOESM1 [file 9560018]
